# Supplementary material
Source: publisher site journal article supplement (https://www.degruyterbrill.com/publication/journal_key/JOC/downloadAsset/JOC_Word_Manuscript_Template.zip)
Supplement: Supplementary file 2 [file JOC_Word_Manuscript_Template.zip]

# Benutzeranleitung zum dg\_manuscript\_template.dotm

---

Wir begrüßen Sie sehr herzlich als Autor bei De Gruyter. Mit diesem Template<sup>1</sup> bieten wir Ihnen eine Möglichkeit ihr Manuskript zu erfassen. Diese Anleitung beschreibt die Funktionsweise und alle grundlegenden Formatvorlagen, damit das Manuskript ein strukturiertes sowie dem De Gruyter-Hausstil angepasstes Layout erhält. Sie müssen die notwendigen Formatvorlagen nicht selbst erstellen, sondern können auf fertige zurückgreifen.

In diesem Zusammenhang stellen wir Ihnen einen Mustertext zur Verfügung, der alle grundlegenden Elemente enthält und deren Anwendung beschreibt. Der Mustertext kann im Template zu Beginn eingefügt werden.

Bitte beachten Sie, dass der Mustertext als erste Hilfestellung dient und dieses Benutzerhandbuch mit wichtigen Hinweisen und Tipps nicht ersetzt.

Wir freuen uns auf eine gute Zusammenarbeit! Verlag De Gruyter

| Version     | Datum   | Autor      | Kommentar                                                                                                                                                                                |
|-------------|---------|------------|------------------------------------------------------------------------------------------------------------------------------------------------------------------------------------------|
| 1.1         | 2016-10 | De Gruyter | Standardansicht zu „Entwurf“ geändert, Fußnotenwarnung an Überschriften eingefügt, Zeichenformate für Bestandteile einer Quellenangabe aufgenommen, Überschriftenebenen 4 und 5 ergänzt. |
| 1.0 (2.2.1) | 2015-09 | De Gruyter | erste Fassung                                                                                                                                                                            |

---

<sup>1</sup> Template-Datei: DG\_manuscript\_template.dotm | Version: 1.1 | 10.2016

# Inhalt

## 1 Voreinstellungen in Word — 3

- 1.1 Makros aktivieren — 3
- 1.2 Manuelle Einstellungen für Word for Mac/Open Office — 3

## 2 Anlegen der Word-Dateien — 3

## 3 Inhalte erfassen/übertragen und prüfen — 4

- 3.1 Manuskript laden (insert document) — 5
- 3.2 Manuskript prüfen (check used style) — 5
- 3.3 Fußnoten prüfen (format footnotes) — 6

## 4 Manuskriptausszeichnung — 7

- 4.1 Die Menüleiste DEGRUYTER — 7
- 4.2 Zuweisung von Formatvorlagen — 7
- 4.3 DEGRUYTER-Formatvorlagen — 7
  - 4.3.1 Button CLEAR FORMAT — 7
  - 4.3.2 Button PRINT PREVIEW — 7
  - 4.3.3 Metadaten (meta data) — 8
  - 4.3.4 Überschriften (heads) — 8
  - 4.3.5 Text (text) — 9
  - 4.3.6 Auflistungen (listings) — 9
  - 4.3.7 Abbildungen (figure) — 9
  - 4.3.8 Tabellen (table) — 10
  - 4.3.9 Linguistische Beispiele (linguistic example) — 11
  - 4.3.10 Boxen (box) — 12
  - 4.3.11 Formeln (equations) — 13
  - 4.3.12 Fußnoten (footnotes) — 13
  - 4.3.13 Verweise (links) — 13
  - 4.3.14 Literaturverzeichnis (references) — 14
  - 4.3.15 Arbeitshilfen (tools) — 15
  - 4.3.16 Template-Version (info) — 16

## 5 Datenlieferung — 16

## 6 Index — 17

# 1 Voreinstellungen in Word

Um die Funktionen des Templates in vollem Umfang nutzen zu können, müssen Sie einige Voreinstellungen in Word vornehmen.

Bitte beachten Sie, dass das Template nur mit den MS Word-Versionen ab 2007 eingesetzt werden kann. Ein Einsatz mit den Programmen *Word for Mac* und *Open Office* bzw. *Libre Office* ist nicht möglich.

Im Kapitel 1.2 finden Sie Hinweise, wie Sie die Formate aus unserem Template mit diesen Programmen verwenden können.

## 1.1 Makros aktivieren

Zur Benutzung des Templates ist es notwendig, die Verwendung von Makros zuzulassen.

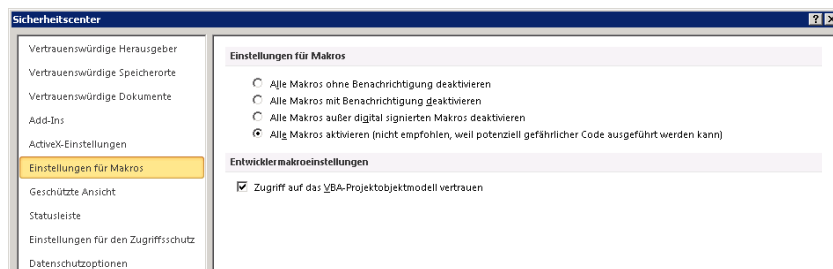

Abbildung 1: Makro-Einstellungen bei Word 2010

Bitte führen Sie folgende Schritte aus, um die Makros in der Ihnen vorliegenden Word-Version zu aktivieren:

|           |                                                                                                                                                                                                                                                                                                                                                                        |
|-----------|------------------------------------------------------------------------------------------------------------------------------------------------------------------------------------------------------------------------------------------------------------------------------------------------------------------------------------------------------------------------|
| Word 2007 | <ul style="list-style-type: none"> <li>– <i>Office Symbol</i> (oben links)</li> <li>– <i>Word-Optionen</i>   <i>Häufig verwendet</i>   <i>Entwicklerregisterkarte in der Multifunktionsleiste anzeigen</i> (Häkchen setzen)</li> <li>– im Ribbon: <i>Entwicklertools</i>   <i>Makrosicherheit...</i></li> <li>– <i>alle Makros aktivieren ...</i> auswählen</li> </ul> |
| Word 2010 | <ul style="list-style-type: none"> <li>– Datei   Optionen   Sicherheitscenter   Einstellungen...</li> <li>– <i>alle Makros aktivieren...</i> auswählen</li> </ul>                                                                                                                                                                                                      |
| Word 2013 | <ul style="list-style-type: none"> <li>– Datei   Optionen   Trust Center   Einstellungen...</li> <li>– <i>alle Makros aktivieren...</i> auswählen</li> </ul>                                                                                                                                                                                                           |

## 1.2 Manuelle Einstellungen für Word for Mac/Open Office

Falls Sie keine Möglichkeit haben, MS Word für Windows zu verwenden, können Sie die Absatz- und Zeichenformate aus diesem Template dennoch nutzen, indem Sie die De-Gruyter-spezifischen Formatvorlagen in das aktuelle Dokument übernehmen. Bitte nutzen Sie die Hilfe ihrer Office-Software, um den Schritt im Detail durchführen zu können.

# 2 Anlegen der Word-Dateien

Bevor mit dieser Vorlage Inhalte erfasst oder vorhandene Manuskripte überarbeitet werden können, muss mit dem Template eine neue Word-Datei angelegt werden.

Gehen Sie dazu bitte wie folgt vor:

1. Speichern Sie die Dokumentvorlage DG\_MANUSCRIPT\_TEMPLATE.DOTM im selben Verzeichnis ab, in dem Sie auch die Word-Datei zu Ihrem Dokument ablegen werden. So ist sichergestellt, dass die Word-Datei problemlos auf die Makrovorlage zugreifen kann und Ihnen das erforderliche Menü angezeigt wird.
2. Öffnen Sie die Dokumentvorlage per Doppelklick. Als geöffnete Datei erhalten Sie das Word-Dokument DOKUMENT1.DOCX und es öffnet sich ein Fenster, in dem Sie die Einstellungen für das aktuelle Dokument festlegen müssen (siehe Abbildung 2)
3. Über DATEIIMPORT haben Sie die Möglichkeit ein schon vorhandenes Manuskript in das Dokument einzufügen und zu bearbeiten (siehe Kapitel 3).
4. Mit Klick auf OK wird das Dokument mit den gewünschten Eigenschaften in der Entwurfsansicht angelegt.

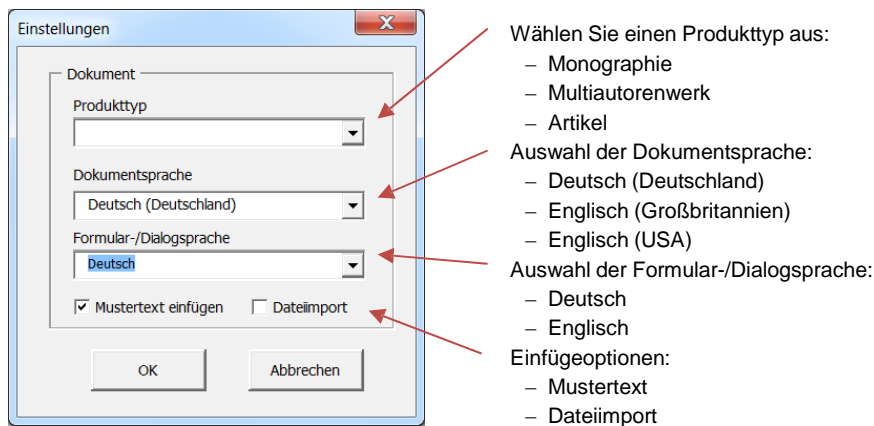

Abbildung 2: Startdialog

*Dokumentsprache:* Bitte geben Sie ebenfalls an, in welcher Sprache ihr Dokumenttext verfasst ist. Sollte ihr Dokument in einer anderen als der zur Verfügung stehenden Sprachen erstellt sein, wählen Sie bitte Englisch (USA).

*Formular-/Dialogsprache:* Auch bei der Dialogsprache für die Menüs kann zwischen Deutsch und Englisch gewählt werden. Beide Funktionen können im Nachhinein noch über TOOLS | LANGUAGE SETTING geändert werden (siehe Kapitel 4.3.15).

Zum Schluss wählen Sie bitte zwischen DATEIIMPORT und MUSTERTEXT LADEN. Die Funktion MUSTERTEXT LADEN erstellt automatisch einen Beispielttext mit den grundlegenden Textelementen und deren Formatierungen. **Diese stellen lediglich eine Bedienungshilfe dar und müssen von Ihnen überschrieben werden.**

---

**Hinweis:** Öffnen Sie die Dokumentvorlage niemals über das mit der rechten Maustaste verfügbare Kontextmenü oder über das Word-Menü Datei | Öffnen ... als „.dotm“-Datei, da Sie dann vom System nicht verarbeitet werden kann.

---

### 3 Inhalte erfassen/übertragen und prüfen

Sobald das neue Dokument erstellt wurde, können Sie ihre Texte erfassen bzw. übertragen sowie die Formatvorlagen prüfen und zuweisen. Dazu stehen Ihnen die Makros CHECK USED STYLES und INSERT DOCUMENT im Ribbon TOOLS zur Verfügung (siehe Kapitel 3.1 and 3.2).

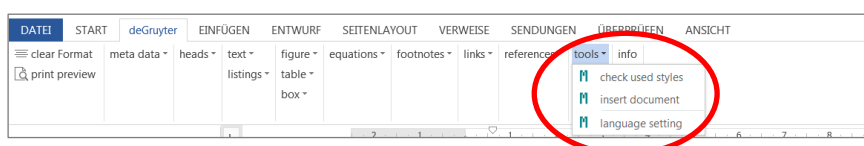

Abbildung 3: Makros für das Übertragen und Prüfen des Inhaltes

Folgendes Vorgehen wird empfohlen:

1. Laden Sie ein bestehendes Dokument mit dem Makro INSERT DOCUMENT (siehe Kap. 3.1).
2. Nachdem der Inhalt in das Template eingefügt wurde, nutzen Sie für das Prüfen und Zuweisen der Formatvorlagen das Makro CHECK USED STYLES. Häufig vorkommende Formatvorlagen, wie z.B. für Fließtext, können Sie mit den Word-Funktionen „Suchen und Ersetzen“ (*STRG + F* oder *Start / Bearbeiten / Ersetzen*) zuweisen (siehe Kap. 3.2).
3. Formatvorlagen, die nicht im Manuskript-Template genutzt werden, können über CHECK USED STYLES aus dem Dokument entfernt werden (siehe Kap. 3.2).
4. Im Anschluss kann das Makro FORMAT FOOTNOTES angewandt werden (siehe Kap. 3.3).

### 3.1 Manuskript laden (insert document)

Wenn Sie das Makro INSERT DOCUMENT anwählen, erscheint ein Explorer-Fenster, indem Sie ihre Datei auswählen können.

Beachten Sie, dass nur Word-Dateien mit den Dateitypen *.doc* und *.docx* importiert werden. Wenn Mustertext über den Startdialog eingefügt wurde, wird dieser nicht beim Einfügen von einem vorhandenen Text überschrieben. Entfernen Sie daher den Mustertext, **bevor** sie das Makro INSERT DOCUMENT anwenden.

Eine rote Markierung erhalten die Absätze, die entweder keine oder eine templatefremde Formatvorlage verwenden und eine DEGRUYTER-Formatvorlage benötigen (siehe Kap. 3.2).

Alternativ können Sie den gesamten Text ihres Manuskriptes markieren und kopieren, um danach die Inhalte über die Word-Funktion *Einfügen / Inhalte einfügen... / Formatierter Text (RTF)* in das neue Dokument zu importieren. Wichtig ist, dass Sie *formatierter Text* wählen, damit alle Kursivierungen, Unterstreichungen etc. nicht verloren gehen.

### 3.2 Manuskript prüfen (check used style)

Starten Sie das Prüfmakro CHECK USED STYLES über TOOLS.

1. Es werden alle unformatierten Bereiche geprüft, die mit keiner De Gruyter-Formatvorlage versehen sind.

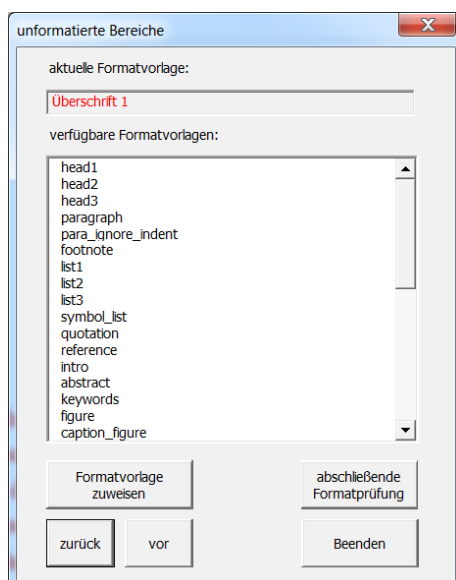

Abbildung 4: Makro CHECK USED STYLES

2. Im Anschluss wird der erste Absatz markiert. Wählen Sie eine Formatvorlage aus der Liste und weisen Sie diese mit dem Button FORMATVORLAGE ZUWEISEN zu (z. B. HEAD 1, PARAGRAPH etc.). Alle Formatvorlagen und ihre Funktion können Sie im Kapitel 4 nachlesen.

3. Mit den Buttons VOR und ZURÜCK können nachfolgende und voranstehende Absätze gewählt werden.
4. Bevor Sie mit BEENDEN das Makro schließen, prüfen Sie das Dokument mit dem Button ABSCHLIEßENDE FORMATPRÜFUNG. Am Ende der abschließenden Formatprüfung wird ein Dialog erscheinen, der die im Folgenden beschriebenen Informationen ausgibt:
  - Es gibt keine unformatierten Bereiche im Dokument.
  - Es gibt Standard-Formatvorlagen (Word-eigene Formatvorlagen wie z.B. *Standard* für Fließtext), die in diesem Dokument nicht zulässig sind und in eine DEGRUYTER-Formatvorlage geändert werden sollen.
  - Es gibt Fremd-Formatvorlagen, die aus einem anderen Dokument in das aktuelle Dokument über DATEIIMPORT bzw. INSERT DOCUMENT geladen wurden. Sie können mit JA die fremden Formatvorlagen aus dem Dokument entfernen. Die betroffenen Absätze werden rot markiert. Anschließend kann den betroffenen Absätzen eine DEGRUYTER-Formatvorlage zugewiesen werden.

**Beispiel:** Abbildung 5 zeigt einen rot-markierten Absatz mit einer templatefremden Formatvorlage. Als aktuelle Formatvorlage wurde „Überschrift 1“ erkannt. Über das Makro wird die gewünschte DEGRUYTER-Formatvorlage HEAD1 ausgewählt und zugewiesen.

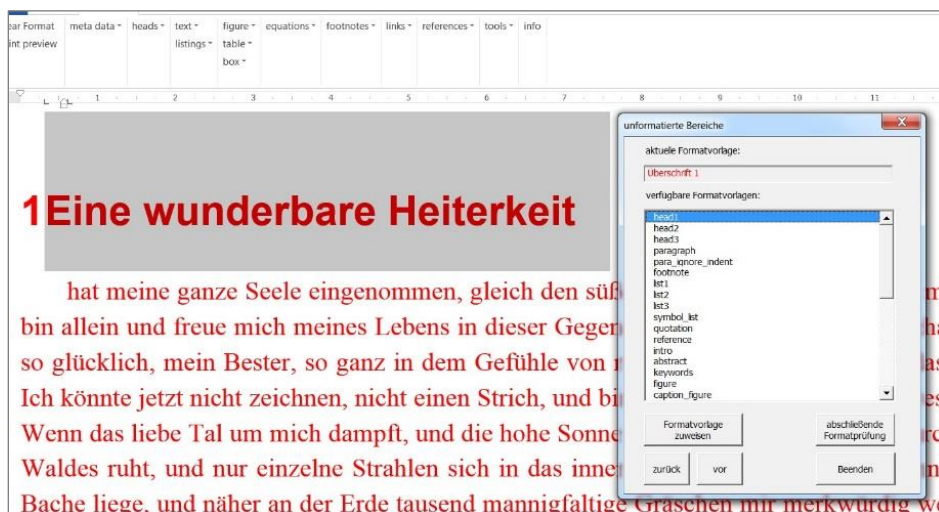

**Abbildung 5:** Markierung eines unformatierten Absatzes

Das Makro CHECK USED STYLES prüft ausschließlich Absatzformatvorlagen. Zeichenformatvorlagen wie BOLD, ITALIC, SMALLCAPS, SUBSCRIPT oder SUPERScript werden nicht geprüft.

**Empfehlung:** Wenn Ihr Manuskript durch Formatvorlagen gut strukturiert wurde, können Sie häufig vorkommende Absatzformatvorlagen über *Suchen-Ersetzen*-Prozesse (Tastenkombination *STRG + F* oder *Start | Bearbeiten | Ersetzen*) mit De Gruyter-Formatvorlagen ersetzen (bspw. bei Fließtext mit Einzug PARAGRAPH oder Fließtext ohne Einzug PARAGRAPH\_IGNORE\_INDENT).

In gleicher Weise können die Überschriftenvorlagen automatisch ersetzt werden (Vorlagen im Template: head1-head3). Die so zugewiesenen Absätze werden vom Prüfmakro als De Gruyter-Formatvorlage erkannt und nicht mehr geprüft.

### 3.3 Fußnoten prüfen (format footnotes)

Mit der Funktion FORMAT FOOTNOTES werden die Formatvorlagen für alle Fußnoten automatisch geprüft und anschließend die richtige Formatvorlage zugewiesen. Sie müssen diese nicht von Hand formatieren.

## 4 Manuskriptausszeichnung

### 4.1 Die Menüleiste DEGRUYTER

Beim Öffnen der Word-Datei erscheint im Kopf rechts neben Start der zusätzliche Tab „deGruyter“ mit allen Formatvorlagen, die zur konformen Auszeichnung des Manuskripts benötigt werden.

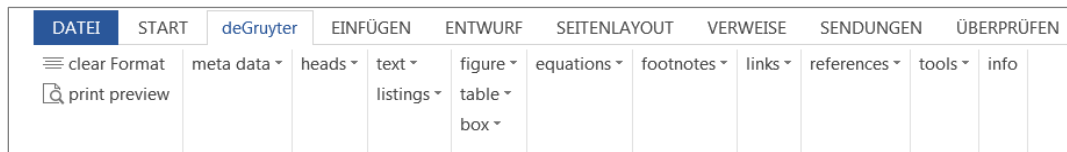

Abbildung 6: Menüleiste DEGRUYTER

### 4.2 Zuweisung von Formatvorlagen

Die Dokumentvorlage DG\_MANUSCRIPT\_TEMPLATE enthält Absatz- und Zeichenformatvorlagen.

Beim Formattyp *Absatz* (P) (zu dem hier auch der Formattyp Absatz mit Liste zählt), werden die Formatvorlagen wie folgt zugewiesen:

1. Platzierung des Cursors an der gewünschten Stelle (optimalerweise am Anfang der Zeile). Bitte dabei keine Zeichen markieren!
2. Zuweisen der Formatvorlage durch Mausklick auf den entsprechenden Menüeintrag in der Menüleiste DEGRUYTER.

Beim Formattyp *Zeichen* (C) betreffen die Änderungen nicht ganze Absätze, sondern nur die ausgewählten Zeichen.

1. Markieren der zu formatierenden Zeichen, Worte oder Absätze mit der Maus.
2. Zuweisung der Formatvorlage durch Mausklick auf den entsprechenden Menüeintrag in der Symbolleiste DEGRUYTER.
3. Mit dem ersten Eintrag in der Menüleiste CLEAR FORMAT kann die Zeichenformatierung wieder auf den Absatz-Standard zurückgestellt werden.

Zusätzlich ist im Menü noch der Formattyp *Makro* (M) zu finden. Er kennzeichnet Formatvorlagen, die mit zusätzlichen Aktionen kombiniert sind (wie z. B. bei der Erstellung der Boxen) oder das Öffnen von Formularen für umfangreichere Aktionen (wie z. B. bei der Erstellung von Tabellen).

### 4.3 DEGRUYTER-Formatvorlagen

Nachfolgend werden die in der DEGRUYTER-Menüleiste enthaltenden einzelnen Menüpunkte sowie die darüber verfügbaren Formatvorlagen, Buttons und Tools vorgestellt und erläutert.

#### 4.3.1 Button CLEAR FORMAT

Markierte Zeichen werden damit auf die Absatzschriftart zurückgesetzt. Es werden alle Zeichenformatierungen wie ITALIC, BOLD oder SMALLCAPS ebenfalls zurückgesetzt.

#### 4.3.2 Button PRINT PREVIEW

Die Seitenansicht wird geöffnet und Word aktualisiert automatisch alle Felder. Diese Funktion wird u. a. bei den Boxen benötigt (siehe Kapitel 4.3.10).

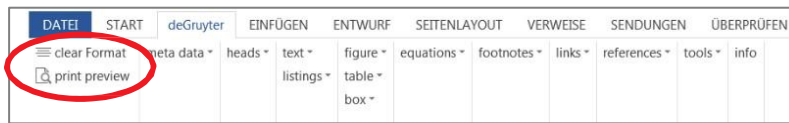

Abbildung 7: Buttons in der Menüleiste DEGRUYTER

### 4.3.3 Metadaten (meta data)

Die folgenden Formatvorlagen beschreiben die Metadaten ihres Titels. Bei einer späteren Produktion finden die Daten im Frontmatter, und dort hauptsächlich in der Titelei bzw. im Artikelkopf, Verwendung.

Tabelle 1: Formatvorlagen zur Formatierung von Metadaten

| Formatvorlage    | Verwendung für                | Formattyp |
|------------------|-------------------------------|-----------|
| book_title       | Buchtitel, bis zu drei Zeilen | Absatz    |
| book_subtitle    | Untertitel                    | Absatz    |
| author           | Buchautor(en)                 | Absatz    |
| editor           | Herausgeber des Buches        | Absatz    |
| article_author   | Autor(en) des Artikels        | Absatz    |
| article_editor   | Herausgeber des Artikels      | Absatz    |
| article_subtitle | Untertitel                    | Absatz    |
| article_title    | Artikeltitel                  | Absatz    |

### 4.3.4 Überschriften (heads)

Hier sind alle zu verwendenden Überschriftenarten gelistet. Die nummerierten Überschriften der 1. bis 5. Ebene haben einen festen Abstand nach der Zahl. Alle Überschriftenformate haben voreingestellte Abstände nach oben und unten; bitte fügen Sie keine zusätzlichen Leerzeilen hinzu.

Bitte beachten Sie das Überschriften von Verzeichnissen innerhalb der Titelei (z.B. Vorwort, Abkürzungsverzeichnis, Autorenverzeichnis, etc.) und des Anhangs (z.B. Register, Literaturverzeichnis, etc.) nicht nummeriert werden. Um diese korrekt zu formatieren, verwenden Sie bitte die Formatvorlagen FRONT\_MATTER\_TITLE, FRONT\_MATTER\_TITLE\_TOC (Überschrift des Inhaltsverzeichnisses), BACK\_MATTER\_TITLE und BACK\_MATTER\_DIVIDING\_TITLE. Erfolgt eine Unterteilung z. B. im Literaturverzeichnis, erhalten diese Zwischenüberschriften die Formatvorlage SUB\_REFERENCE\_TITLE.

Die genaue Verwendung der einzelnen Überschriftenformate entnehmen Sie bitte der untenstehenden **Tabelle 2:** Formatvorlagen zur Formatierung von Überschriften.

Tabelle 2: Formatvorlagen zur Formatierung von Überschriften

| Formatvorlage    | Verwendung für                                    | Formattyp |
|------------------|---------------------------------------------------|-----------|
| chapter_author   | Autor(en) eines Abschnittes in Multiautorenwerken | Absatz    |
| chapter_title    | Beitragstitel in Multiautorenwerken               | Absatz    |
| chapter_subtitle | Untertitel in Multiautorenwerken                  | Absatz    |
| part_title       | Überschrift auf Zwischentitelseiten               | Absatz    |
| head1            | Überschrift 1. Ebene                              | Absatz    |
| head2            | Überschrift 2. Ebene                              | Absatz    |
| head3            | Überschrift 3. Ebene                              | Absatz    |



| Formatvorlage             | Verwendung für                                                                                                    | Formattyp |
|---------------------------|-------------------------------------------------------------------------------------------------------------------|-----------|
| head4                     | Überschrift 4. Ebene                                                                                              | Absatz    |
| head5                     | Überschrift 5. Ebene                                                                                              | Absatz    |
| front_matter_title        | unnummerierte Überschriften im Frontmatterbereich (z.B. Vorwort, Abkürzungsverzeichnis, Autorenverzeichnis, etc.) | Absatz    |
| front_matter_title_toc    | Überschrift des Inhaltsverzeichnis'                                                                               | Absatz    |
| back_matter_title         | unnummerierte Überschriften im Backmatterbereich (z.B. Index, Literaturverzeichnis, etc.)                         | Absatz    |
| back_matter_dividingtitle | Untertitel im Backmatterbereich                                                                                   | Absatz    |
| sub_reference_title       | Zwischenüberschriften                                                                                             | Absatz    |

#### 4.3.5 Text (text)

Hier sind alle Textauszeichnungsmöglichkeiten zu finden.

**Tabelle 3:** Formatvorlagen zur Formatierung von Text

| Formatvorlage      | Verwendung für                                                                                    | Formattyp |
|--------------------|---------------------------------------------------------------------------------------------------|-----------|
| paragraph          | Absatz (Fließtext), eingerückt                                                                    | Absatz    |
| para_ignore_indent | Absatz: Fließtext ohne Einzug (nach Überschriften, Abbildungen, Tabellen, Aufzählungen, Boxen...) | Absatz    |
| abstract           | Abstract (in Multiautorenwerken und Artikeln)                                                     | Absatz    |
| keywords           | Keywords (in Multiautorenwerken und Artikeln)                                                     | Absatz    |
| quotation          | Zitat, Motto, Einschub                                                                            | Absatz    |
| italic             | Auszeichnung des Textes: <i>kursiv</i>                                                            | Zeichen   |
| bold               | Auszeichnung des Textes: <b>fett</b>                                                              | Zeichen   |
| smallcaps          | Auszeichnung des Textes: KAPITÄLCHEN                                                              | Zeichen   |
| subscript          | Auszeichnung des Textes: <small>tiefgestellt</small>                                              | Zeichen   |
| superscript        | Auszeichnung des Textes: <sup>hochgestellt</sup>                                                  | Zeichen   |

#### 4.3.6 Auflistungen (listings)

Es gibt vier unterschiedlich eingerückte Listenarten, deren einleitendes Zeichen oder Zahl selbst gewählt werden kann; danach wird ein Tabstopp gesetzt.

1. LIST1\_text text text
- a) LIST2\_text text text
  - i. LIST3\_text text text

Die SYMBOL\_LIST ist schon mit einem einleitenden n-dash vordefiniert.

- symbol\_list\_text text text

#### 4.3.7 Abbildungen (figure)

Abbildungen **sollten nicht in der Textdatei platziert**, sondern in einer separaten Bilddatei abgespeichert werden. Bitte kennzeichnen Sie die Position der Abbildung im Text eindeutig (z.B. „hier 02\_Abb\_Meier\_01 einfügen“). Jedes Bild

sollte eine kurze Unterschrift besitzen und nummeriert sein. Bei besonders vielen Abbildungen ist eine separate Liste mit Angaben zu Abbildungshinweisen und -größen einzureichen.

Falls Abbildungen jedoch eingefügt werden müssen ist im Template das Makro INSERT FIGURE angelegt.

**Tabelle 4:** Makros und Absatzformate zu Abbildungen

| Formatvorlage  | Verwendung für                                                                                                                                                                   | Formattyp |
|----------------|----------------------------------------------------------------------------------------------------------------------------------------------------------------------------------|-----------|
| insert figure  | Fenster zum Auswählen der Abbildung wird geöffnet; Bild wird eingefügt und es wird automatisch eine Musterbildlegende angelegt; die Formatvorlagen werden automatisch zugewiesen | Makro     |
| figure         | Abbildung (Abbildung wird in Zeile gesetzt, Abstände werden automatisch angepasst)                                                                                               | Absatz    |
| caption_figure | Bildlegende; bei vorhandenen Bildlegenden kann hiermit auch eine Nummerierung hinzugefügt werden                                                                                 | Makro     |

Bitte beachten Sie die folgenden Anweisungen für die Erstellung/den Aufbau von Abbildungen und Grafiken:

|                            |                                                                                                                                                                                                                           |
|----------------------------|---------------------------------------------------------------------------------------------------------------------------------------------------------------------------------------------------------------------------|
| Dateiformat                | eps, ems, tif, jpeg                                                                                                                                                                                                       |
| Auflösung                  | Pixelgrafik (Foto): 2280 Pixel max. Höhe<br>schwarz-weiß (Graustufenbild), farbig: 1441 Pixel max. Breite<br>Strichzeichnungen: 6079 Pixel max. Höhe<br>Kombination Pixelgrafik + Strichzeichnung: 3843 Pixel max. Breite |
| Schriftart, -größe         | serifenlos –Arial, 8 pt                                                                                                                                                                                                   |
| Zusätzliche Auszeichnungen | bold, italic (Kapitälchen und Versalien bitte vermeiden)                                                                                                                                                                  |
| Linienstärken              | schwarze Linien: min. 0,15 mm (ca. 0,5pt) stark graue Linien: min. 0,25 mm (ca. 0,7 pt) stark                                                                                                                             |
| Farben/Flächen             | nur Graustufen – Abstufung von schwarz in 20 %-Schritten (Bitte keine Schatten oder Verläufe)                                                                                                                             |

#### Achtung

Gescannte Abbildungen – Gefahr von Moiré-Effekt (<https://de.wikipedia.org/wiki/Moir%C3%A9-Effekt>)

Screenshots – Gefahr von zu geringer Auflösung

Weitere Informationen zu Abbildungen finden sie im Abschnitt „Hinweise zu Abbildungen“ auf De Gruyter Online: <http://www.degruyter.com/page/59>.

### 4.3.8 Tabellen (table)

Für das Tabellenlayout ist im Template die Tabellenformatvorlage TABLE\_LAYOUT angelegt. Mit dem gleichnamigen Makro aus dem Menü werden neue Tabellen in der richtigen Formatierung angelegt und vorhandene Tabellen können formatiert werden.

**Tabelle 5:** Formatvorlagen zur Formatierung von Tabellen

| Formatvorlage | Verwendung für                                            | Formattyp |
|---------------|-----------------------------------------------------------|-----------|
| table_layout  | Erstellung und Formatierung von Tabellen                  | Makro     |
| caption_table | Tabellenlegende/-überschrift                              | Absatz    |
| table_head    | Text in Tabellenkopf (normalerweise 1. Zeile der Tabelle) | Absatz    |
| table text    | Auszeichnung von Text in Tabellen                         | Absatz    |

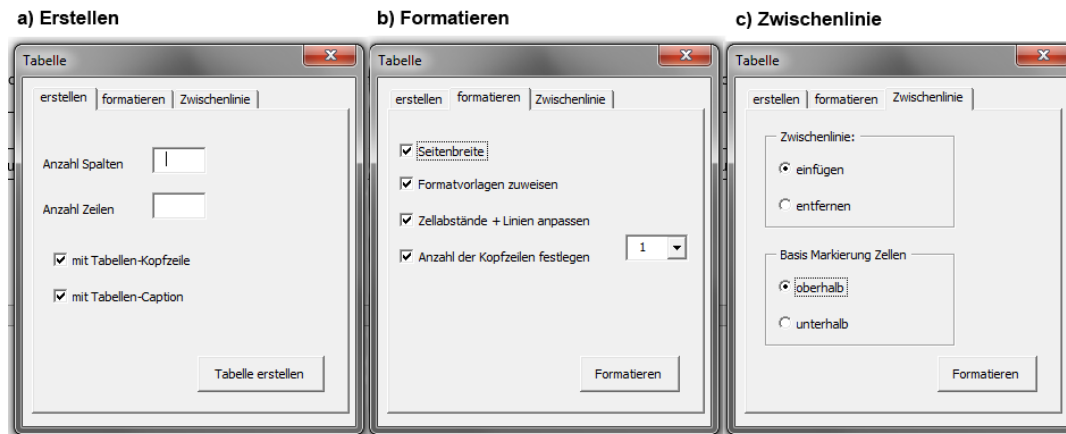

Abbildung 8: Makro TABLE\_LAYOUT

Das Makro TABLE\_LAYOUT funktioniert, wenn man sich entweder in einem leeren Absatz (Abbildung 8a.) oder in einer Tabelle (Abbildung 8 b+c) befindet.

1. Tabelle erstellen (Abb. 8a)  
Hier werden die Anzahl der Spalten und Zeilen eingetragen; außerdem kann noch entschieden werden, ob die Tabelle mit oder ohne Kopfzeile und Caption erstellt werden soll.  
Mit Klick auf TABELLE ERSTELLEN wird eine neue Tabelle im De Gruyter-Stil angelegt.  
Spätere Änderungen an der Tabelle (weitere Zeilen, Erweiterung der Kopfzeile auf mehr als eine Zeile usw.) können vorgenommen werden, dann ist es aber nötig, das Makro noch ein weiteres Mal für die Formatierung aufzurufen.
2. Tabelle formatieren (Abb. 8b)  
Mit Klick auf FORMATIEREN wird die ausgewählte Tabelle an den De Gruyter-Stil angepasst; es werden – je nach Auswahl im Formular – die Formatvorlagen, Zellabstände, Linien und Kopfzeilen gesetzt.  
**Seitenbreite:** ist das Häkchen gesetzt, wird die Tabelle auf Seitenbreite vergrößert bzw. verkleinert. Bei besonders schmalen Tabellen sollte das Häkchen entfernt werden.  
**Formatvorlagen zuweisen:** die Formatvorlagen TABLE\_HEAD für den Tabellenkopf und TABLE\_TEXT für den Tabellentext werden zugewiesen.  
**Zellabstände + Linien anpassen:** Vor und nach Linien müssen die Zellabstände größer als in den restlichen Tabellenzeilen sein. Mit dieser Funktion werden die korrekten Abstände erzeugt.  
**Anzahl der Kopfzeilen festlegen:** es können 0–3 Zeilen festgelegt werden.
3. Zwischenlinien (Abb. 8c)  
In der Standardtabelle sind nur Linien am oberen und unteren Rand und nach der Kopfzeile festgelegt. Es können zusätzlich noch dünnere Zwischenlinien angelegt werden, wenn nötig. Dazu markiert man die Zeile oder – wenn es nicht über die ganze Zeile gehen soll – die jeweiligen Zellen, wählt einfügen aus und gibt an, ob die Linie ober- oder unterhalb der Markierung hinzugefügt werden soll. Mit dem Klick auf FORMATIEREN wird die Zwischenlinie eingefügt. Die Zwischenlinien können auf dieselbe Weise mit Auswahl entfernen wieder gelöscht werden. Die Tabellen im vorliegenden Dokument, u. a. im Abschnitt 4.3.4 zu sehen, sind mit Zwischenlinien formatiert.

#### 4.3.9 Linguistische Beispiele (linguistic example)

Linguistische Beispiele werden mithilfe einer blinden Tabelle gesetzt. Die Tabelle wird mit dem Makro LINGUISTIC EXAMPLE erstellt. Das Makro funktioniert, wenn man sich in einem leeren Absatz befindet. Bei Anwendung erscheint folgendes Dialogfenster, um die Anzahl der Spalten und Zeilen eingetragen:

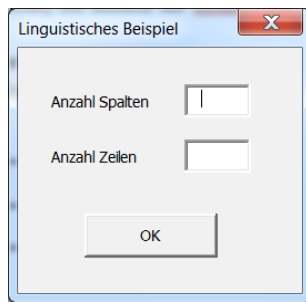

**Abbildung 9:** Eingabedialog für die Erstellung einer blinden Tabelle über LINGUISTIC EXAMPLE

Mit Klick auf OK wird eine neue blinde Tabelle angelegt (ohne Rahmenlinien).

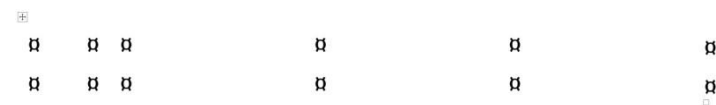

**Abbildung 10:** Blinde Tabelle mit Absatzmarken (STRG + Umschalt + \* )

Nachdem Sie die blinde Tabelle erstellt haben, müssen folgende Einstellungen mithilfe des Menüs *Tabellentools* geändert werden:

1. Schalten Sie die Absatzmarken der einzelnen Zellen sichtbar, indem Sie die Schaltfläche ¶ (Start | Absatz) oder das Tastenkürzel *STRG + Umschalt + \** verwenden.
2. Markieren Sie die erste Spalte. Es wird das Menü *Tabellentools* in der Menüleiste eingeblendet.
3. Stellen Sie die Spaltenbreite der ersten Spalte mit 7 mm über *Tabellentools | Layout | Zellengröße | Breite* ein.
4. Markieren Sie nun die zweite Spalte und stellen Sie die Breite 4 mm ein, wie in Punkt 3 beschrieben. Alle weiteren Spaltenbreiten können Sie frei wählen.
5. Der Text innerhalb der Tabelle erhält das Absatzformat *PARA\_IGNORE\_INDENT*.

#### 4.3.10 Boxen (box)

Für das Erstellen von Boxen (Hinweisfelder) kann das Makro *BOX* verwendet werden. Befindet man sich in einem leeren Absatz, wird eine neue Box erzeugt, wenn nicht, wird der ausgewählte Absatz zur Box. Vor und nach der Box werden automatisch Abstände gesetzt.

**Tabelle 6:** Formatvorlagen zur Formatierung und Erstellung von Boxen

| Formatvorlage    | Verwendung für                                                                                  | Formattyp |
|------------------|-------------------------------------------------------------------------------------------------|-----------|
| create empty box | Erstellung einer neuen Box                                                                      | Makro     |
| box              | Auszeichnung von Text in Boxen                                                                  | Absatz    |
| box_list         | * Liste mit frei wählbarem Zeichen, Tabstopp danach muss mit STRG+Tabulatortaste gesetzt werden | Absatz    |
| box_symbol_list  | – mit n-dash vordefinierte Liste                                                                | Absatz    |

#### 4.3.11 Formeln (equations)

Diese Formatvorlagen werden für die strukturierte Auszeichnung von Formeln verwendet.

**Tabelle 7:** Formatvorlagen zur Formatierung von Formeln

| Formatvorlage  | Verwendung für      | Formattyp |
|----------------|---------------------|-----------|
| formula_block  | Formelzeile         | Absatz    |
| formula_inline | Formel im Fließtext | Zeichen   |

#### 4.3.12 Fußnoten (footnotes)

Hier stehen die Formatvorlagen für Fußnoten. Der Punkt INSERT FOOTNOTE startet ein Makro, welches neue Fußnoten schon in richtig formatierter Form einfügt.

Mit FORMAT FOOTNOTES werden (z. B. durch Textübernahme hinzugefügte) Fußnoten im gesamten Dokument formatiert.

**Tabelle 8:** Formatvorlagen zur Formatierung von Fußnoten

| Formatvorlage    | Verwendung für                             | Formattyp |
|------------------|--------------------------------------------|-----------|
| insert footnote  | fügt eine neue Fußnote ein                 | Makro     |
| format footnotes | formatiert Fußnoten im kompletten Dokument | Makro     |
| footnote         | Fließtext in Fußnoten                      | Absatz    |

Bitte setzen Sie keine Fußnoten an Titeln oder Überschriften! Diese können bei einer späteren XML-Verarbeitung ihres Manuskripts nicht konvertiert werden sodass De Gruyter die betreffenden Fußnoten umwandelt. Hinweise und/oder Erläuterungen zu Titeln und/oder Überschriften können als Anmerkung am Ende der Seite eingebunden und mit dem Absatzformat FOOTNOTE formatiert werden.

Das Template gibt eine Warnung beim Anlegen einer Fußnote an Überschriften, unterbindet diese Funktion allerdings nicht.

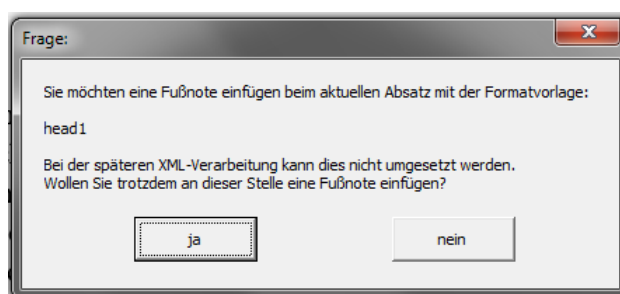

**Abbildung 11:** Fehlermeldung beim Anfügen einer Fußnote an Überschriften

#### 4.3.13 Verweise (links)

Für die strukturierte Auszeichnung von Verweisen und Hyperlinks steht das Zeichenformat WEBLINK zur Verfügung.

#### 4.3.14 Literaturverzeichnis (references)

Die im Folgenden beschriebenen Format- und Zeichenvorlagen sollten für das Literaturverzeichnis verwendet werden. Für die Überschrift wird die Formatvorlage HEADS | BACK\_MATTER\_TITLE verwendet. Formatvorlagen für Untertitel oder Zwischenüberschriften im Literaturverzeichnis finden Sie im Kapitel 4.3.4 beschrieben. Folgt ein einleitender Absatz der Überschrift, wird dieser mit der Formatvorlage INTRO formatiert. Die einzelnen bibliographischen Nachweise (Verzeichniseinträge) haben das Format REFERENCE.

**Tabelle 9:** Formatvorlagen zur Formatierung von Literaturverzeichnissen

| Formatvorlage | Verwendung für                                 | Formattyp |
|---------------|------------------------------------------------|-----------|
| reference     | Standardauszeichnung für alle Literaturangaben | Absatz    |
| intro         | Introtex, ohne hängenden Einzug                | Absatz    |

Ihr Manuskript wird von De Gruyter professionell gesetzt und in das XML-Format konvertiert. Um die dafür notwendigen Prozesse zu automatisieren und zu beschleunigen **sind Autoren angehalten, soweit möglich alle Bestandteile einer Quellenangabe** mit entsprechenden im Template eingebundenen Zeichenformaten **zu markieren!**

Den einzelnen Zeichenformaten sind Farben zugewiesen, die sie sich wahlweise über die Funktion REFERENCE-COLOR ON anzeigen lassen können. Über REFERENCE-COLOR OFF wird die Farbanzeige deaktiviert. Beim Zuweisen der Zeichenformate ist es empfehlenswert, die Farben anzuzeigen. Tabelle 10 bietet eine Übersicht der zur Verfügung stehenden Zeichenformate und erläutert deren Verwendung.

**Tabelle 10:** Zeichenformate für die Auszeichnung der Bestandteile einer Quellenangabe

| Name           | Verwendung für                                                                                                                                              | Formattyp |
|----------------|-------------------------------------------------------------------------------------------------------------------------------------------------------------|-----------|
| article-title  | Auszeichnung eines Artikeltitels                                                                                                                            | Zeichen   |
| chapter-title  | Auszeichnung eines Kapiteltitels                                                                                                                            | Zeichen   |
| collab         | Auszeichnung einer Gruppe von Autoren, die unter einem Namen publizieren (auch Organisationen die als Autoren eintreten)                                    | Zeichen   |
| comment        | Auszeichnung von unstrukturiertem Text innerhalb einer Literaturangabe                                                                                      | Zeichen   |
| ref_edition    | Auszeichnung der Auflage (gesamter Ausdruck) des zitierten oder referenzierten Werks.                                                                       | Zeichen   |
| ext-link       | Auszeichnung eines Links                                                                                                                                    | Zeichen   |
| fpage          | Seitenzahl der <i>ersten</i> Seite im Dokument                                                                                                              | Zeichen   |
| given-names    | Markierung aller Vornamen einer Person (i.d.R. Autor) wie z.B. Vorname, Zweitname, Mädchenname etc.                                                         | Zeichen   |
| isbn           | Auszeichnung der ISBN                                                                                                                                       | Zeichen   |
| issn           | Auszeichnung der ISSN                                                                                                                                       | Zeichen   |
| issue          | Auszeichnung der Heftnummer                                                                                                                                 | Zeichen   |
| lpage          | Seitenzahl der <i>letzten</i> Seite im Dokument.                                                                                                            | Zeichen   |
| publisher-loc  | Auszeichnung des Verlagsstandorts (bzw. Ort der Publikation), in der Regel eine Stadt wie New York oder Berlin.                                             | Zeichen   |
| publisher-name | Auszeichnung des Verlegers (in der Regel ein Verlag, kann auch eine Person, ein Unternehmen oder eine andere Einheit sein die das Werk veröffentlicht hat.) | Zeichen   |
| source         | Auszeichnung des Titels der Quelle (z.B. Zeitschrift, Buch, Konferenzberichte etc.)                                                                         | Zeichen   |
| surname        | Auszeichnung des Nachnamens einer Person                                                                                                                    | Zeichen   |
| trans-source   | Auszeichnung eines übersetzten Titels des Quelldokuments (z.B. Zeitschrift, Buch, Konferenzbericht)                                                         | Zeichen   |
| trans-title    | Auszeichnung eines übersetzten Titels (z.B. Artikeltitel)                                                                                                   | Zeichen   |
| uri            | Auszeichnung eines weblinks                                                                                                                                 | Zeichen   |
| volume         | Auszeichnung der Volume- bzw. Bandnummer                                                                                                                    | Zeichen   |
| year           | Jahr der Publikation                                                                                                                                        | Zeichen   |

**Beispiele:****Quellenangabe Buch:**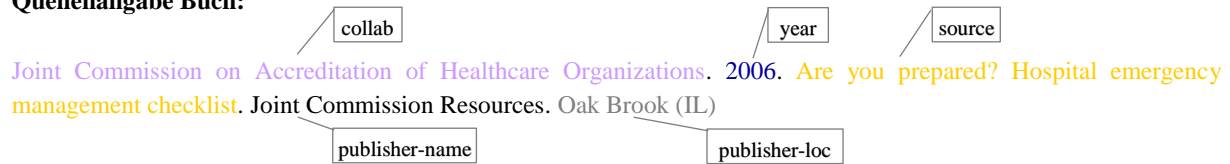**Beitrag in einem Beitragswerk:**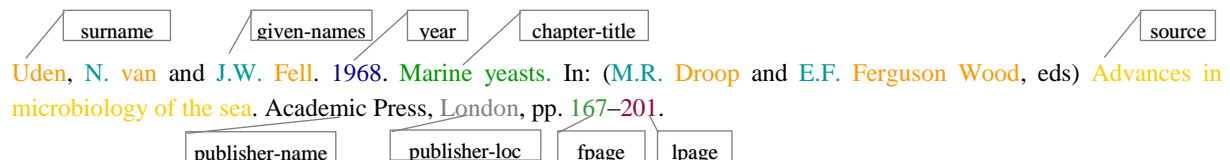**Zeitschriftenartikel (print)**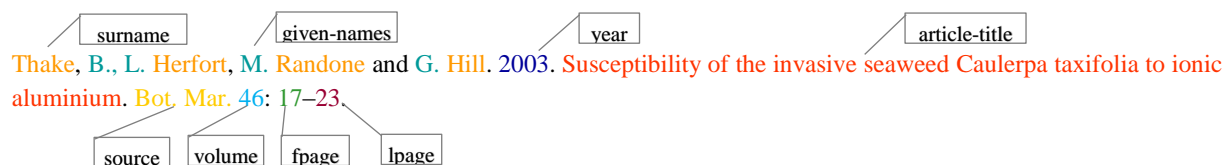**Zeitschriftenartikel (online)**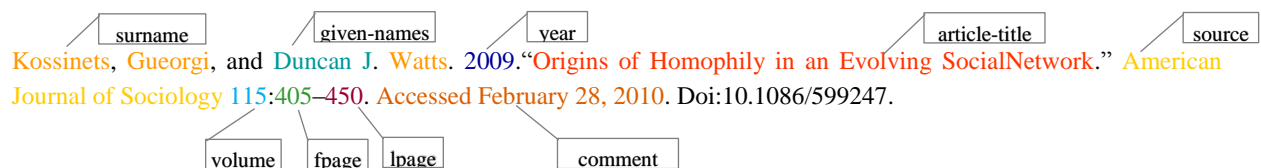**4.3.15 Arbeitshilfen (tools)**

Folgende Tools sind in diesem Template eingebunden:

**Tabelle 11:** Im Template enthaltene Arbeitshilfen

| Formatvorlage     | Verwendung für                                                                               | Formattyp |
|-------------------|----------------------------------------------------------------------------------------------|-----------|
| check used styles | prüft die angewendeten Formatvorlagen, Hilfsmittel zum Zuweisen der DeGruyter-Formatvorlagen | Makro     |
| insert document   | Laden eines vorhandenen Word-Dokumentes                                                      | Makro     |
| language setting  | Dokument- und Dialogsprache ändern                                                           | Makro     |

Die Funktion und Anwendung der Makros CHECK USED STYLES und INSERT DOCUMENT sind im Kapitel 3 näher beschrieben.

Mit LANGUAGE SETTING können die Dokument- und Dialogsprache nachträglich geändert werden. Es stehen wie auch im Startmenü zur Verfügung:

- Deutsch (Deutschland)
- Englisch (Großbritannien)
- Englisch (USA)

Sollte ihr Dokument in einer anderen als der zur Verfügung stehenden Sprachen erstellt sein, wählen Sie bitte Englisch (USA).

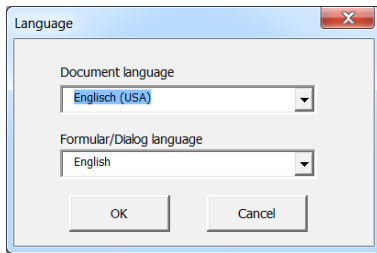

Abbildung 12: Sprachauswahl über LANGUAGE SETTING

#### 4.3.16 Template-Version (info)

Das Makro INFO zeigt die aktuelle Template-Version.

## 5 Datenlieferung

Bitte senden Sie die offenen Daten, d.h. die Word-Datei, abgespeichert im Dateiformat *.docx*, und eine PDF-Datei an De Gruyter.

Die PDF-Datei können Sie entweder in Word über *Speichern unter* mit dem Dateityp *.pdf* generieren oder über *Drucken* mit einem PDF-Drucker (AdobePDF, PDFCreator o. ä.).

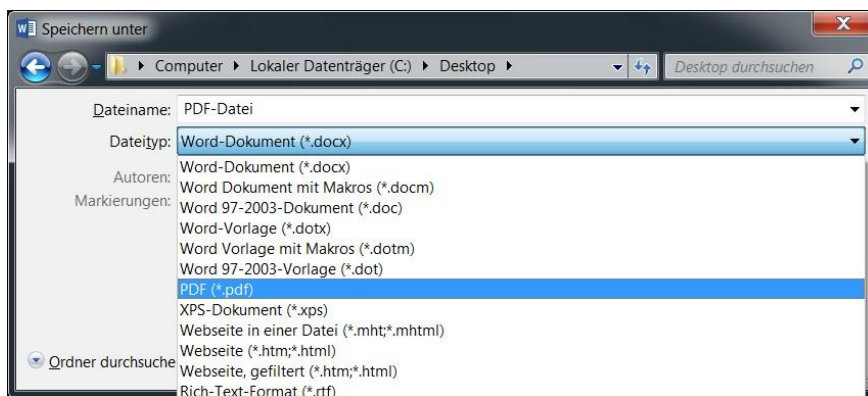

Abbildung 13: PDF über Speichern unter generieren



## 6 Index

Abbildung 10  
Absatzformatvorlage 7  
Auflistung 9

Box 12

check used styles 4, 5, 15  
– Formatvorlage zuweisen 5

Datei importieren 5  
Daten liefern 16  
Dialogsprache 4, 15  
Dokumentvorlage 4

Equations 12

Felder aktualisieren 7  
Figures 9  
Formatvorlagen 7  
– Absatz 7  
– Zeichen 7  
Formeln 12  
Fußnoten 13  
– einfügen 13  
– formatieren 5, 6, 13

Hinweisfeld *Siehe* Box  
Hyperlinks 13

Inhalte  
– einfügen 5  
insert document 5, 15  
interlinearer Satz 11  
linguistic example 11

Links 13  
Listen 9  
Literaturverzeichnis 13  
– einleitender Absatz 14  
– Zwischenüberschrift 14

Makro 3, 7  
Manuskript  
– auszeichnen 7  
– laden 5  
– prüfen 5  
Menüleiste 7  
Mustertext einfügen 4

Open Office 3

Produkttyp  
– Artikel 4  
– Monographie 4  
– Multiautorenwerk 4

Referenzen 14

Seitenvorschau 7  
Spracheinstellungen 4, 15  
*Suchen-Ersetzen* 6

Tabellen 10  
– erstellen 11  
– formatieren 11  
– Zwischenlinien 11  
Textauszeichnung 9  
Titelei 8

Überschriften 8

Verweis 13  
Verzeichniseintrag 14

Word for Mac 3

Zeichenformatvorlage 7
